# Supplementary material for: Few-layer MoS2 dispersion induced by sulfur atom sharing to promote CO2 hydrogenation to methanol
Source: Royal Society of Chemistry journal article supplement (doi:10.1039/d6ta01545j), 2026-06-05
Supplement: d6ta01545j1.pdf [file d6ta01545j1.pdf]

## Supporting Information

### Few-layer MoS<sub>2</sub> dispersion induced by sulfur atom sharing to promote CO<sub>2</sub> hydrogenation to methanol

Gustavo A.S. Alves<sup>a</sup>, Silvio Bellomi<sup>a</sup>, Tobias Wagner<sup>a</sup>, Alberto Tampieri<sup>a</sup>, Christian Etzlstorfer<sup>a</sup>, Michael Stöger-Pollach<sup>b</sup>, Daniel C. Cano-Blanco<sup>c,d</sup>, Karin Föttinger<sup>a\*</sup>

<sup>a</sup> Institute of Materials Chemistry, TU Wien, Getreidemarkt 9/BC/01, 1060 Vienna, Austria

<sup>b</sup> University Service Center for Transmission Electron Microscopy (USTEM), TU Wien, Stadionallee 2/057-02, 1020 Vienna, Austria

<sup>c</sup> Paul Scherrer Institute, PSI Center for Energy and Environmental Sciences, Villigen PSI, CH-5232, Switzerland

<sup>d</sup> École Polytechnique Fédérale de Lausanne (EPFL), Institute of Chemical and Bioengineering, Lausanne CH-1015, Switzerland

\* Corresponding author

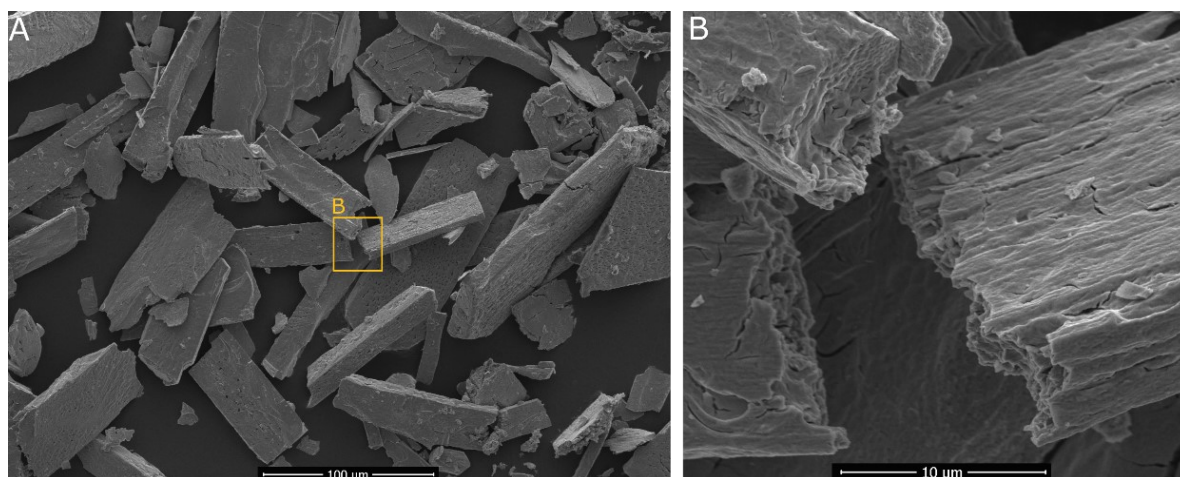

Figure S1 - SEM micrographs of bulk MoS<sub>2</sub> produced by thermal treatment of ATTM, under 1000x (A) and 10000x (B) magnification

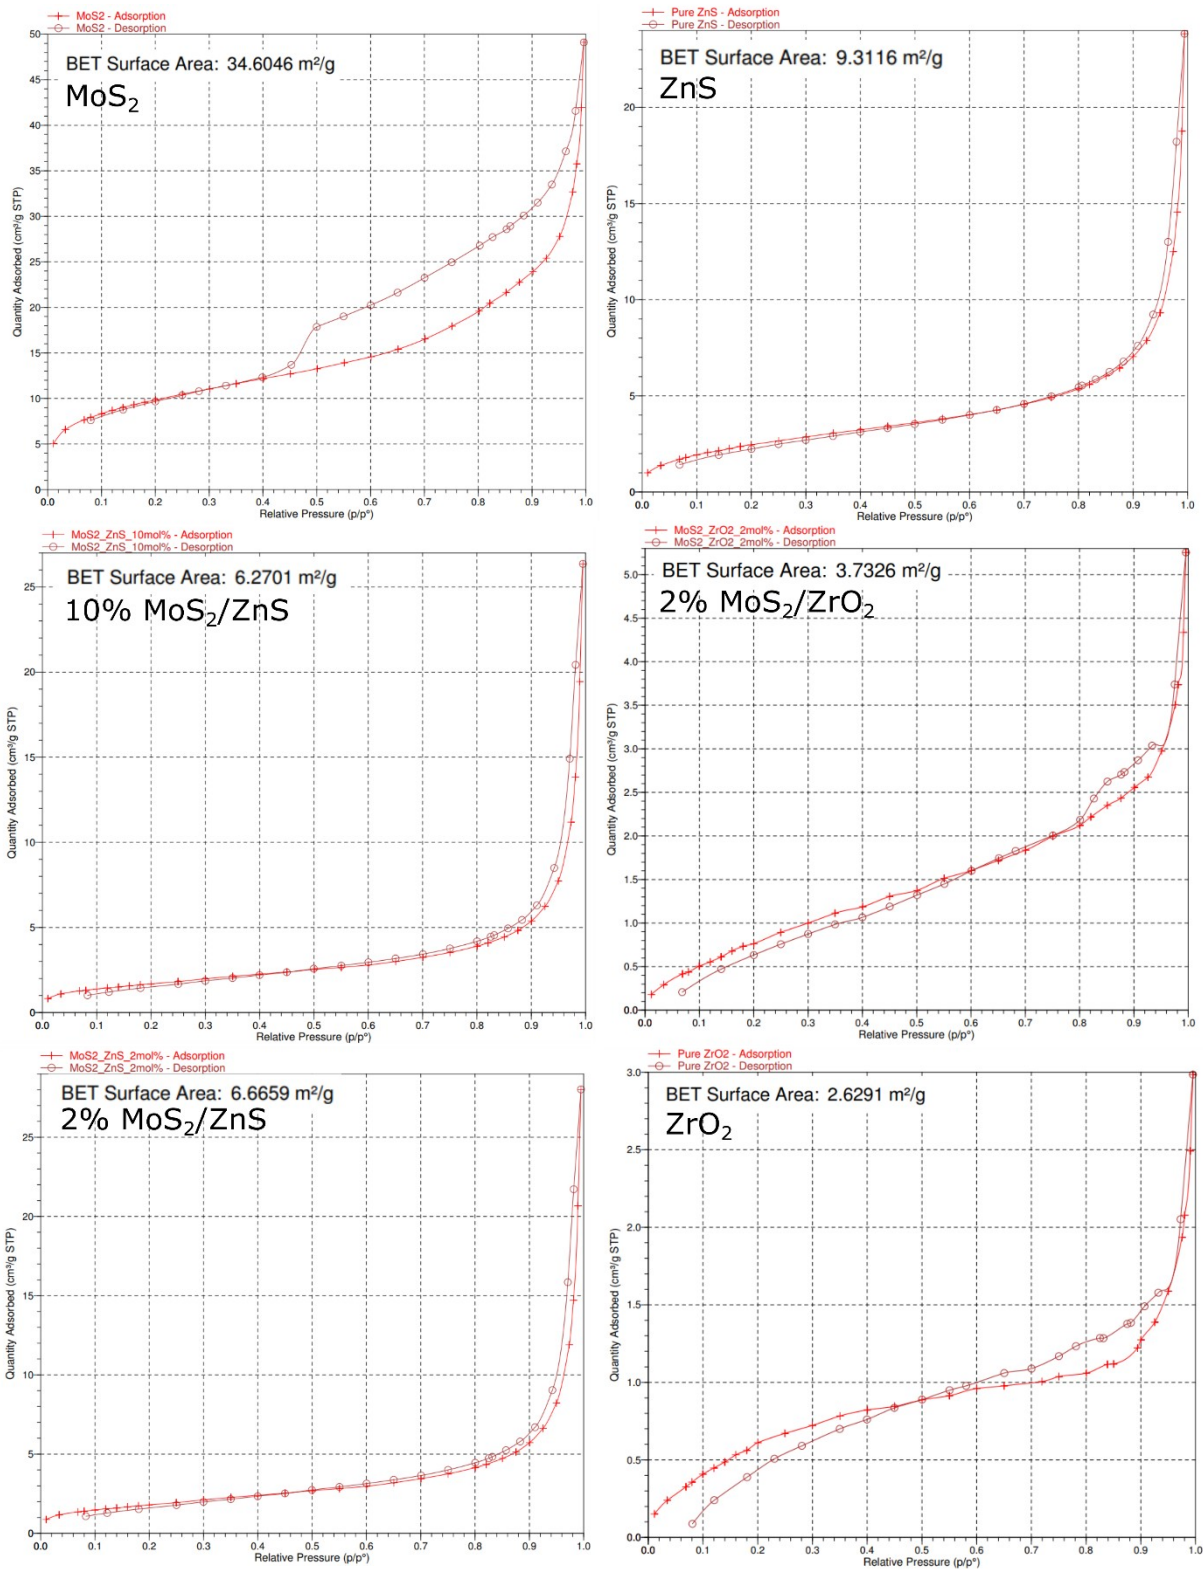

Figure S2 – N<sub>2</sub> adsorption-desorption isotherms and surface areas determined by the BET method for as-synthesized MoS<sub>2</sub>, ZnS, ZrO<sub>2</sub> 2% MoS<sub>2</sub>/ZnS, 10% MoS<sub>2</sub>/ZnS and 2% MoS<sub>2</sub>/ZrO<sub>2</sub>

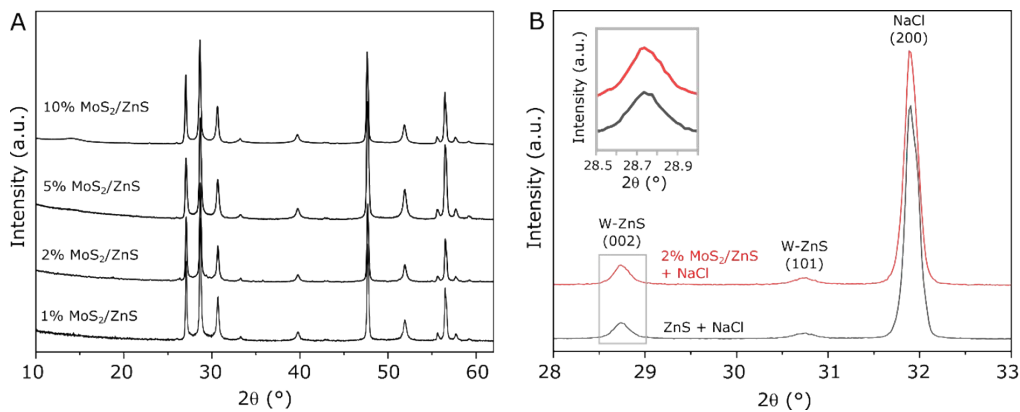

Figure S3 - X-ray diffraction patterns of 10, 5, 2 and 1% MoS<sub>2</sub>/ZnS (A) and comparison of 1% 2% MoS<sub>2</sub>/ZnS with ZnS using NaCl as an internal standard

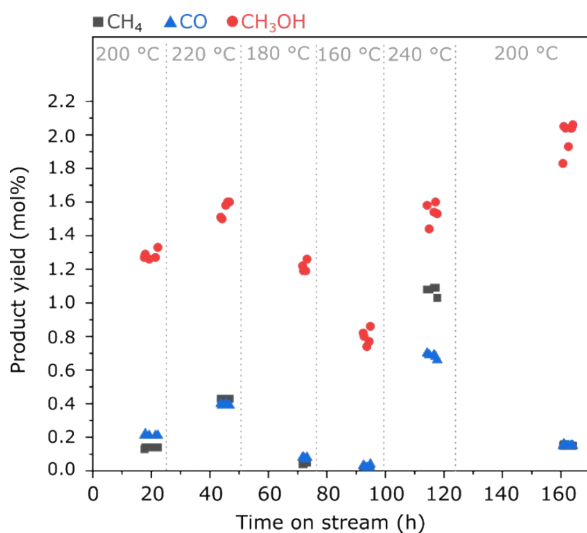

Figure S4 - Catalytic activity of 2% MoS<sub>2</sub>/ZnS in a fixed-bed reactor at 20 bar/200 °C/0.5 g<sub>cat</sub> in terms of CH<sub>4</sub>, CO and CH<sub>3</sub>OH yields at different reaction temperatures

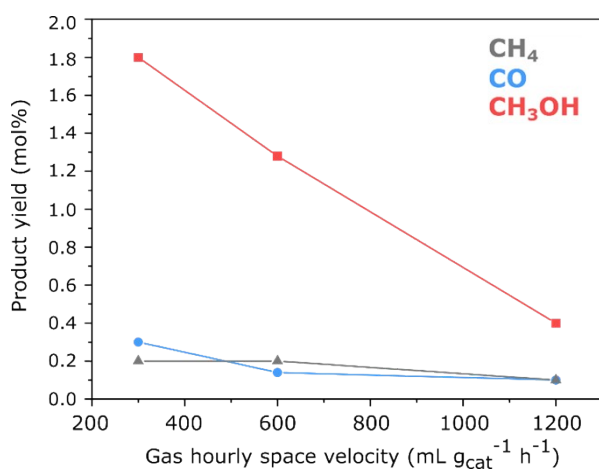

Figure S5 - Catalytic activity of 2% MoS<sub>2</sub>/ZnS in a fixed-bed reactor at 20 bar/200 °C in terms of CH<sub>4</sub>, CO and CH<sub>3</sub>OH yields using 1, 0.5 or 0.25 g<sub>cat</sub>.

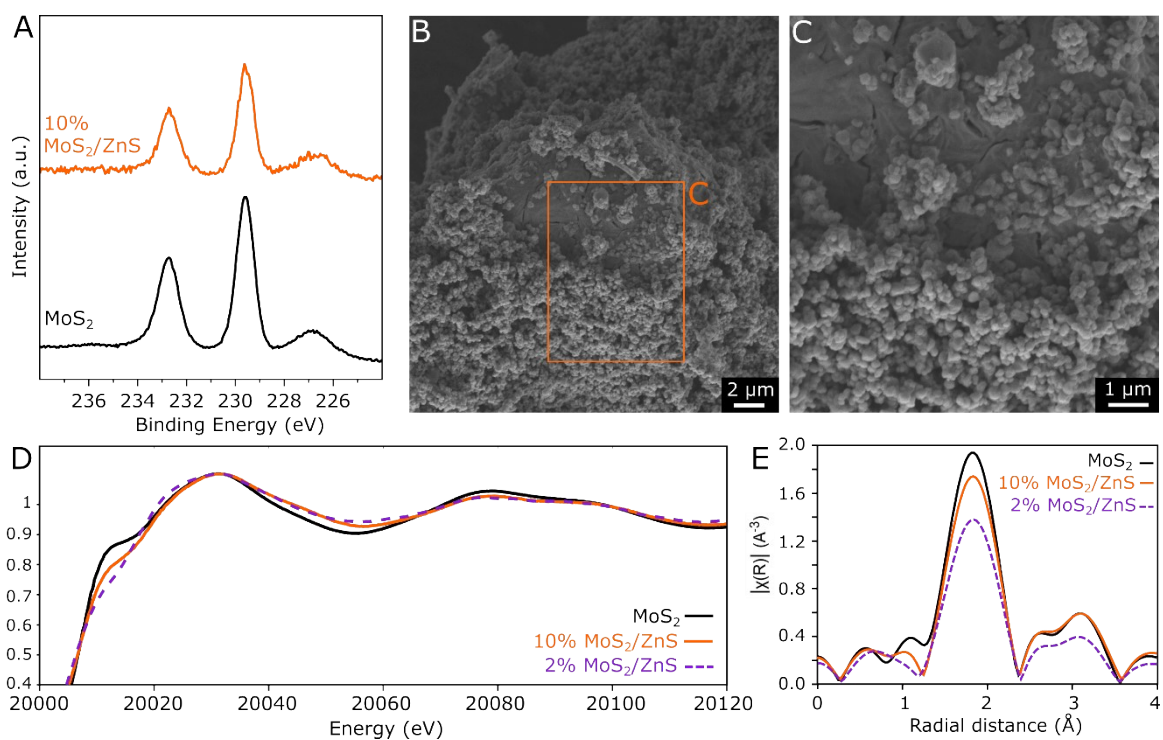

Figure S6 - High-resolution XPS spectrum of the Mo 3d/S 2s region (A), SEM micrographs (B,C), Mo K-edge XANES (D) and EXAFS (E) spectra of as-synthesized 10% MoS<sub>2</sub>/ZnS compared with relevant samples

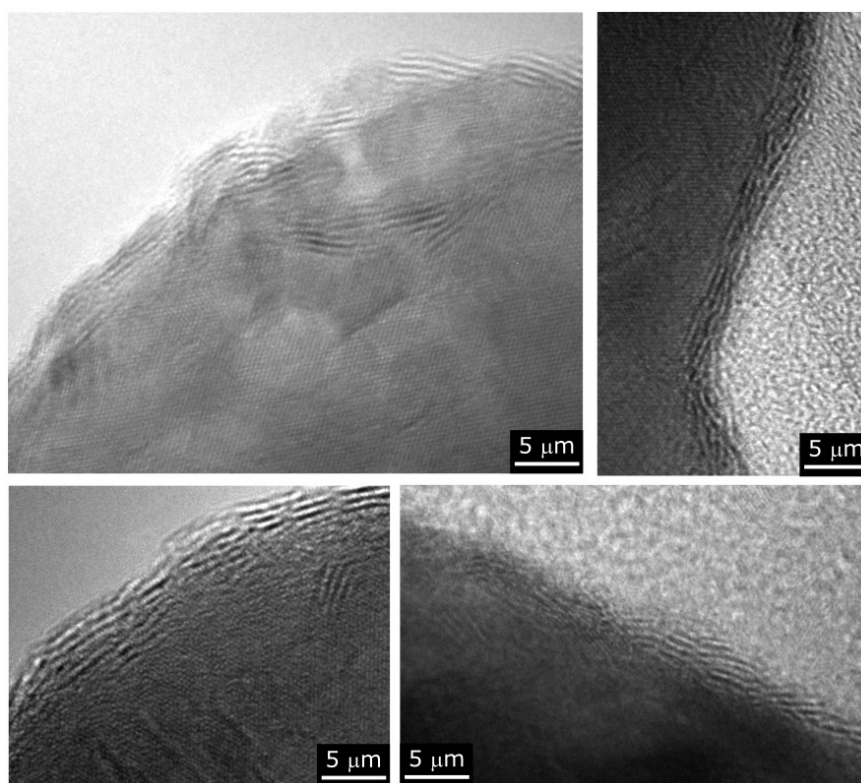

Figure S7 - Additional Transmission Electron Microscopy images of 2% MoS<sub>2</sub>/ZnS

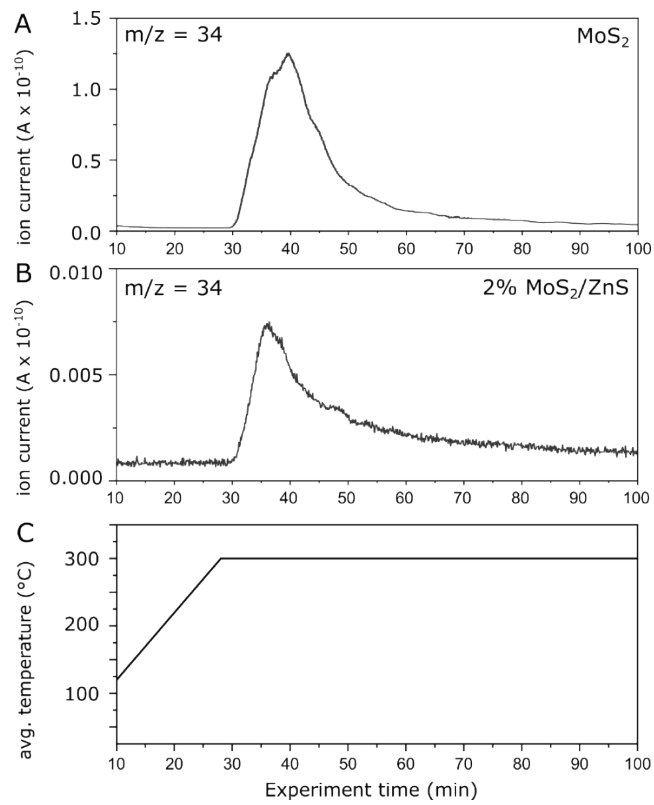

Figure S8 - Evolution of  $\text{H}_2\text{S}$  ( $m/z = 34$ ) from  $\text{MoS}_2$  (A) and 2%  $\text{MoS}_2/\text{ZnS}$  (B) measured by mass spectrometry during  $\text{H}_2$  treatment at  $300^{\circ}\text{C}$  following a  $10^{\circ}\text{C}/\text{min}$  heating ramp (C)

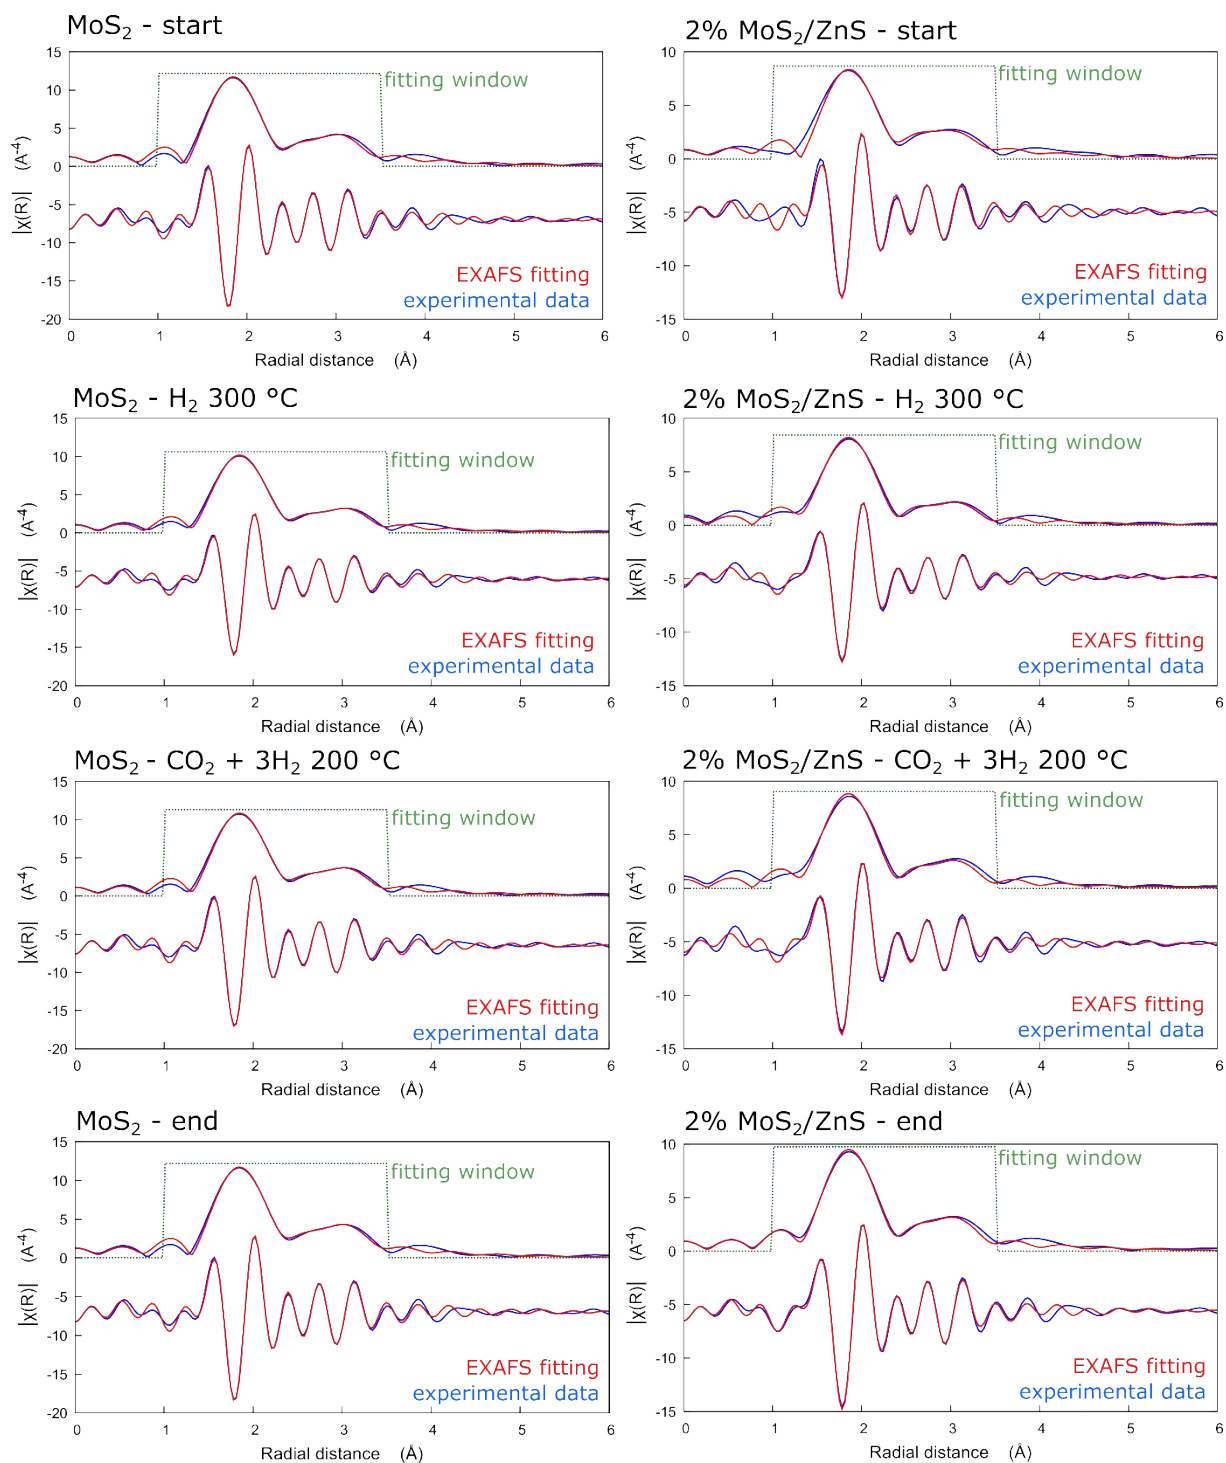

Figure S9 - Summary of EXAFS fitting compared with *in-situ* experimental data for  $\text{MoS}_2$  and  $2\% \text{MoS}_2/\text{ZnS}$

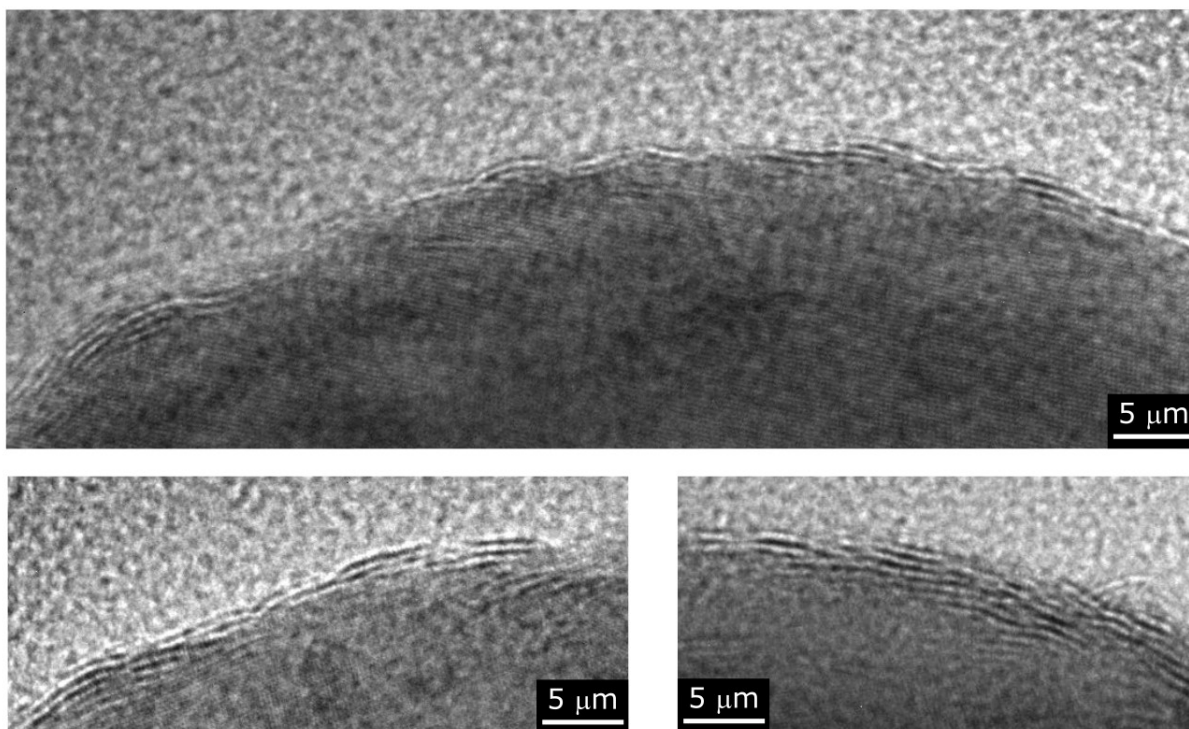

Figure S10 - Transmission Electron Microscopy images of 2% MoS<sub>2</sub>/ZnS after H<sub>2</sub> treatment at 300°C

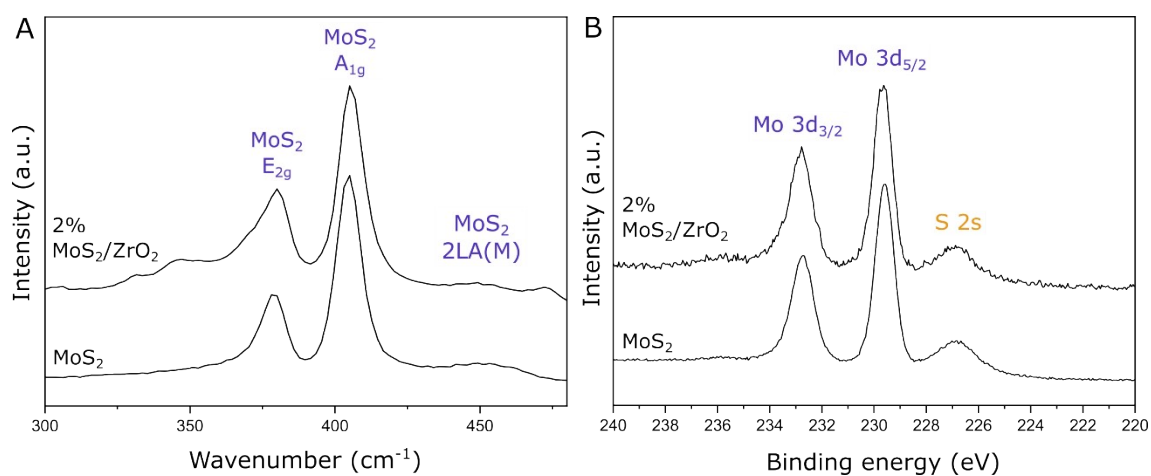

Figure S11 - Raman spectrum with 532 nm excitation (A) and high-resolution XPS spectrum of the Mo 3d/S2s region (B) of pure MoS<sub>2</sub> and 2% MoS<sub>2</sub>/ZrO<sub>2</sub>

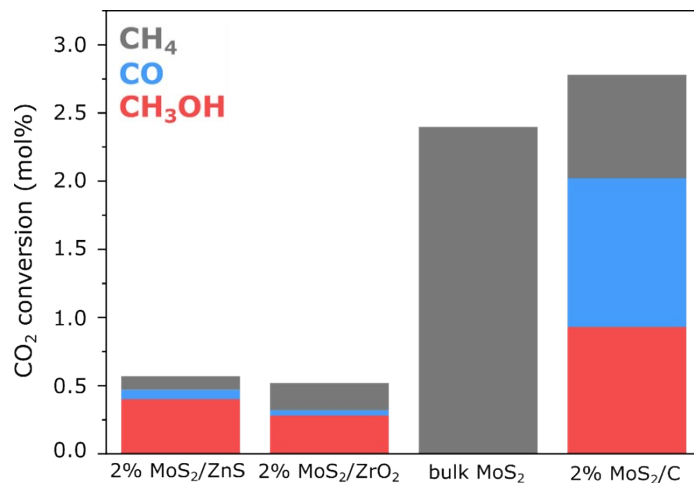

Figure S12 - Catalytic activity of 2% MoS<sub>2</sub>/C at 20 bar/200 °C/0.25 g<sub>cat</sub> compared with MoS<sub>2</sub>, 2% MoS<sub>2</sub>/ZnS and 2% MoS<sub>2</sub>/ZrO<sub>2</sub> in terms of CO<sub>2</sub> conversion to CH<sub>4</sub>, CO and CH<sub>3</sub>OH

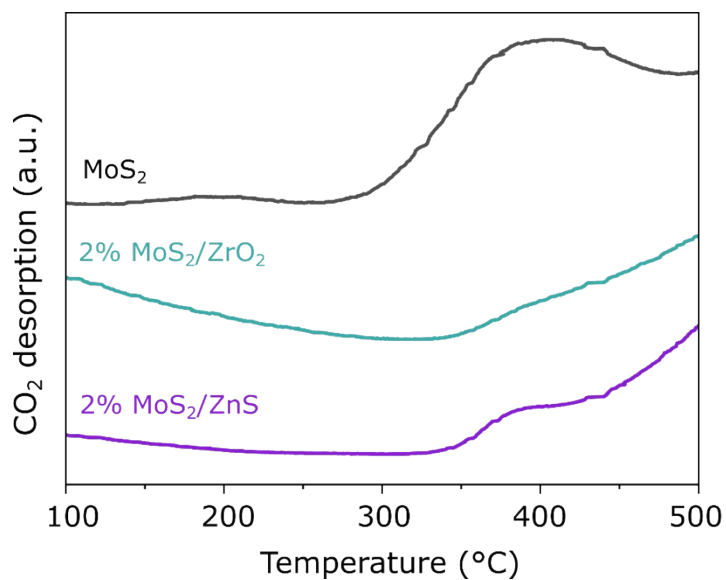

Figure S13 – CO<sub>2</sub>-TPD profiles of MoS<sub>2</sub>, 2% MoS<sub>2</sub>/ZnS and 2% MoS<sub>2</sub>/ZrO<sub>2</sub>

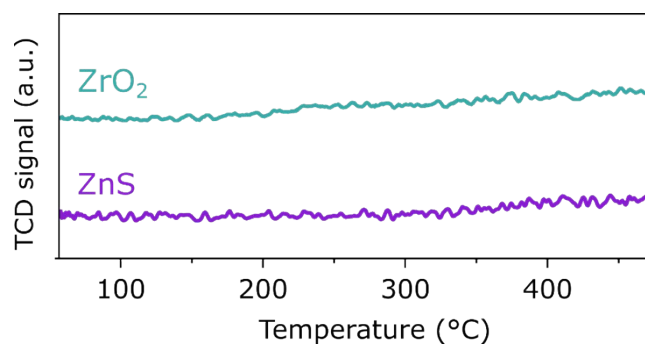

Figure S14 – H<sub>2</sub>-TPR profile of the ZnS ZrO<sub>2</sub> supports

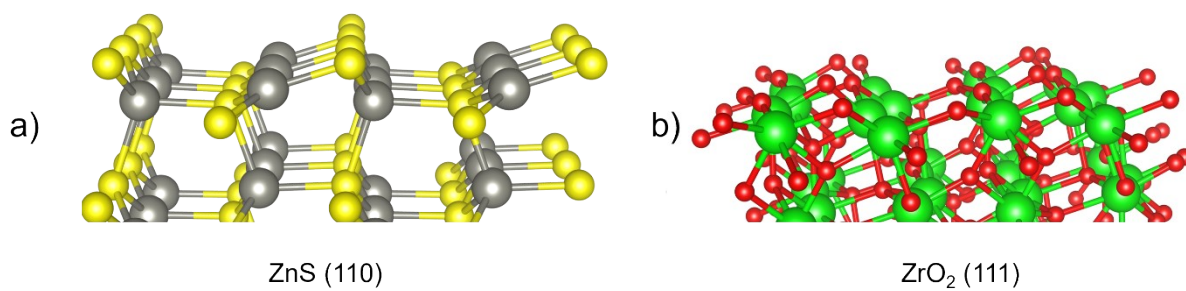

Figure S15 - Optimized structural models for the ZnS (100) and ZrO<sub>2</sub> (111) terminations

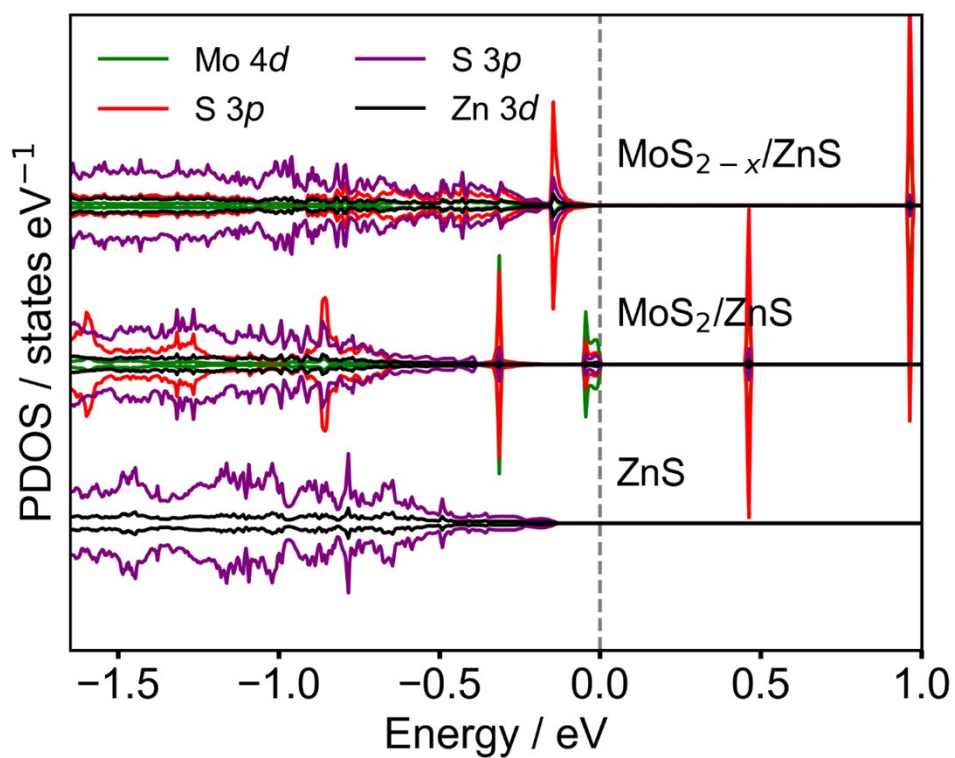

Figure S16 - Partial density of states in proximity of the Fermi level used to calculate the occupied centroids of the Mo 4*d*, S 3*p* and Zn 3*d* states for MoS<sub>2-x</sub>/ZnS, MoS<sub>2</sub>/ZnS and ZnS.

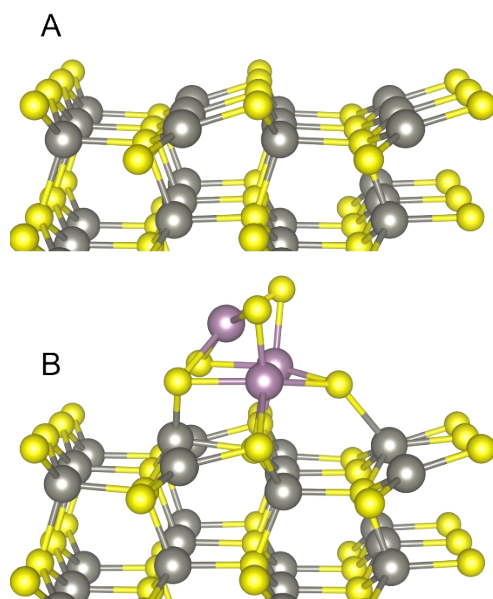

Figure S17 - Optimized structures of ZnS and MoS<sub>2-x</sub>/ZnS demonstrating the reorganization of the Zn and S sub-lattices of ZnS required to accommodate the vacant MoS<sub>2-x</sub> patch.

| Model                         | Supercell<br>l | In-plane dimensions (Å) | $\gamma$ cell angle (°) |
|-------------------------------|----------------|-------------------------|-------------------------|
| MoS <sub>2</sub><br>monolayer | 4×4×1          | 12.6×10.9               | 120                     |
| ZnS (100)                     | 3×2×1          | 11.4×12.5               | 90                      |
| ZrO <sub>2</sub> (111)        | 2×2×1          | 14.6×14.8               | 114.7                   |

Table S1 – Characteristics in-plane dimensions of the supercells for the different terminations.

|                             |                                            | N (Mo-S)  | N (Mo-Mo) | $\sigma^2$ (Å <sup>2</sup> ) | $\Delta E$ (Mo-S)<br>(eV) | $\Delta E$ (Mo-Mo)<br>(eV) |
|-----------------------------|--------------------------------------------|-----------|-----------|------------------------------|---------------------------|----------------------------|
| MoS <sub>2</sub>            | Start                                      | 5.6 ± 0.7 | 3.4 ± 1.0 | 0.003 ± 0.002                | 1.4                       | 0.5                        |
| MoS <sub>2</sub>            | H <sub>2</sub> 300 °C                      | 5.5 ± 0.6 | 3.0 ± 0.8 | 0.005 ± 0.001                | 0.7                       | 0.7                        |
| MoS <sub>2</sub>            | CO <sub>2</sub> + H <sub>2</sub><br>300 °C | 5.6 ± 0.7 | 3.3 ± 0.9 | 0.004 ± 0.001                | 1.4                       | 0.4                        |
| MoS <sub>2</sub>            | End                                        | 5.6 ± 0.7 | 3.5 ± 0.9 | 0.003 ± 0.001                | 1.3                       | 0.7                        |
| 2%<br>MoS <sub>2</sub> /ZnS | Start                                      | 3.7 ± 1.1 | 2.0 ± 1.4 | 0.003 ± 0.003                | 3.3                       | - 2                        |
| 2%<br>MoS <sub>2</sub> /ZnS | H <sub>2</sub> 300 °C                      | 5.7 ± 0.6 | 2.9 ± 0.9 | 0.008 ± 0.001                | 2.8                       | - 0.3                      |
| 2%<br>MoS <sub>2</sub> /ZnS | CO <sub>2</sub> + H <sub>2</sub><br>300 °C | 5.9 ± 0.8 | 3.4 ± 1.2 | 0.007 ± 0.002                | 3.3                       | 0.5                        |
| 2%<br>MoS <sub>2</sub> /ZnS | End                                        | 5.8 ± 0.7 | 3.7 ± 1.0 | 0.006 ± 0.001                | 3.0                       | 0.2                        |

Table S2 - Summary of EXAFS fitting parameters for the *in situ* XAS experiment

| Structure                             | E (eV)   | $\Delta E(\text{MoS}_{2-x}\text{-MoS}_2)/N(\text{MoS}_2)^*$ (eV) |
|---------------------------------------|----------|------------------------------------------------------------------|
| MoS <sub>2</sub> / ZnS                | -488.57  | -                                                                |
| MoS <sub>2-x</sub> /ZnS               | -484.18  | 1.47                                                             |
| MoS <sub>2</sub> / ZrO <sub>2</sub>   | -1877.65 | -                                                                |
| MoS <sub>2-x</sub> / ZrO <sub>2</sub> | -1874.33 | 1.11                                                             |
| *N(MoS <sub>2</sub> ) = 3             |          |                                                                  |

Table S3 - Total electronic energy values (eV) for the optimized interfaces and energy difference between the pristine and defective interface normalized by the number of MoS<sub>2</sub> unit formula.
